# Supplementary material
Source: publisher site journal article supplement (https://www.dovepress.com/get_supplementary_file.php?f=395026.docx)
Supplement: Supplementary file 1 [file get_supplementary_file.php]

Supporting information

**Supporting Information**

**
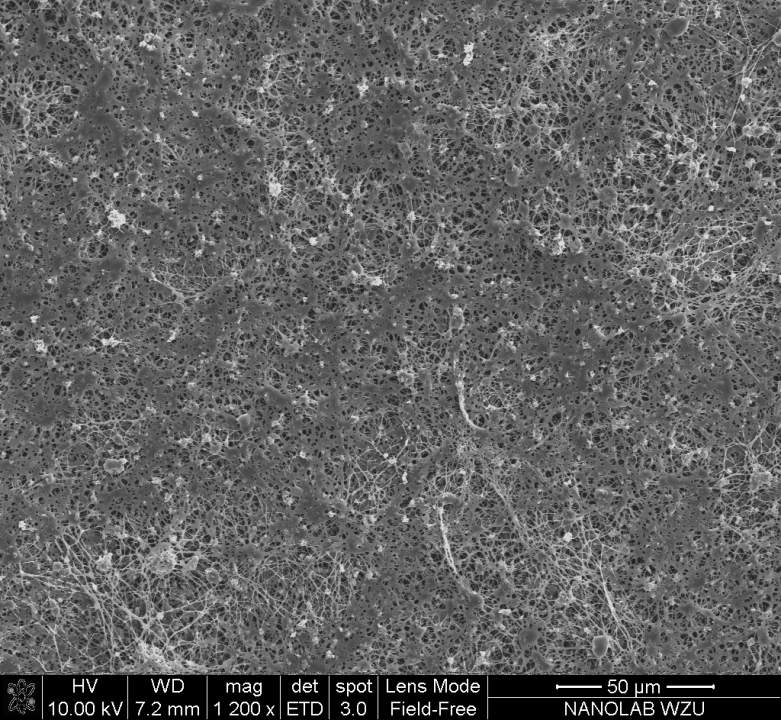
**

**Fig. S1:** SEM image of MgONPs-PCL/PTH-PCL nanofibers (MgONPs=0.5)

**
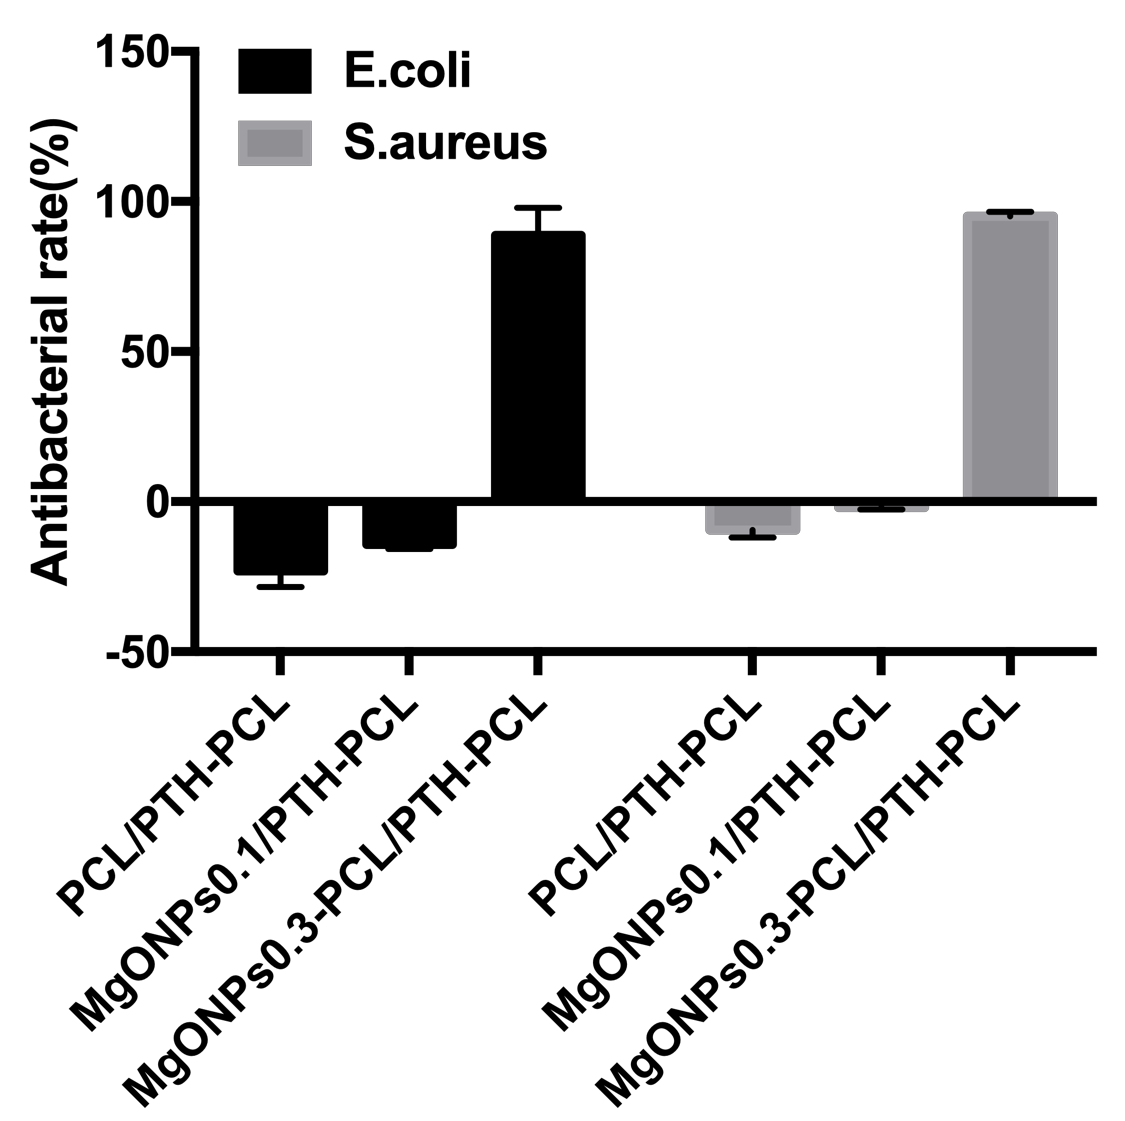
**

**Fig. S2:** Antibacterial effects of MgONPs-PCl/PTH-PCL (MgONPs=0.1 and 0.3) and PCL/PTH-PCL against *S. aureus* and *E. coli.* Values are mean ± SD from 3 independent experiments.


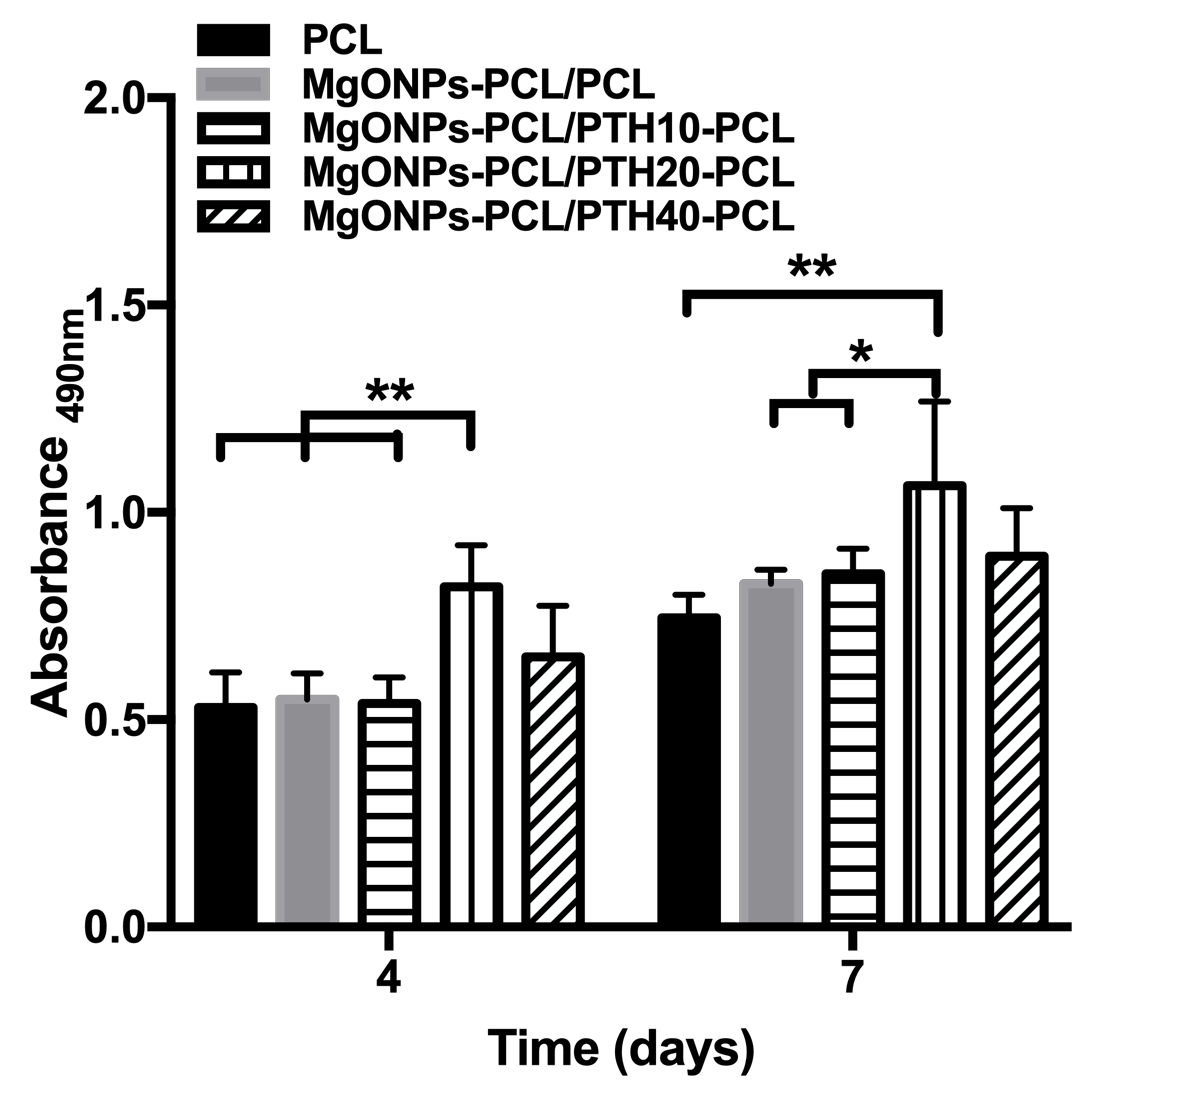


**Fig. S3:** The effects of PCL and MgONPs-PCL/PTHn-PCL membranes on proliferation of MC3T3-E1 cells. Values are mean ± SD from 4 independent experiments. Significant effect of treatment, **p < 0.01, *p < 0.05.

|  |
| --- |
|  |  |
